# Supplementary material
Source: PubMed Central journal article supplement (PMC3020779)

## Supplemental Data

**Table S1. Combinations of G $\alpha$ i and G $\alpha$ q dependent GPCR ligands yield synergistic Ca<sup>2+</sup> responses.**

|      | C5a | UDP | UTP |                                              |
|------|-----|-----|-----|----------------------------------------------|
| UDP  | Y   | nd  | N   | <u>Apparent G<math>\alpha</math> Linkage</u> |
| UTP  | Y   | N   | nd  | i                                            |
| LPA  | N   | Y   | Y   | q                                            |
| S1P  | Y   | Y   | nd  | i/q                                          |
| Spir | N   | Y   | Y   |                                              |

NIH-3T3 cells stably expressing C5aR or Ro2 were stimulated with combinations of C5a (10 nM), UTP (100  $\mu$ M), UDP (100  $\mu$ M), LPA (50 nM), S1P (50 nM), and Spiradoline (Spir, 100 nM). Ligands dependent on PTx-sensitive G-proteins are labeled in blue. Ligands showing partial sensitivity to PTx are labeled in green. Ligands insensitive to PTx and presumed to be dependent on G $\alpha$ q are labeled in red. “Y” indicates the presence of synergy from dual-ligand stimulations, inferred from replicate assays, and “N” indicates the absence of synergy. Combinations for which synergy was not determined are marked ‘nd’.

**Figure S1. Expression of mPLC $\beta$ 3 in PLC $\beta$ 2/3<sup>-/-</sup> BMDM restores synergistic Ca<sup>2+</sup> responses to levels observed in WT BMDM.** Single cell Ca<sup>2+</sup> assays were performed on WT or PLC $\beta$ 2/3<sup>-/-</sup> BMDM transduced with retrovirus encoding YFP-FLAG or YFP-mPLC $\beta$ 3. Cells were stimulated with C5a (0.75 nM), UDP (500 nM), or C5a+UDP, and the Ca<sup>2+</sup> responses were measured by integration over 2.25 min. The predicted additive (Pred. Additive) response was calculated as the sum of the UDP and C5a responses. Synergy ratios calculated as the ratio of the observed UDP+C5a response to the predicted additive response are displayed in Fig. 2E. Responses by transduced cells were measured in multiple assays of each of 3 independent batches of infected BMDM. Values shown are mean +/- SEM from n=5-6 samples per condition. \*p<0.05.

**Figure S2. Ligand dose-responses.** Intracellular Ca<sup>2+</sup> levels were calculated for Fura-2 loaded NIH-3T3-C5aR cells. Cells were stimulated with varied concentrations of (A) UTP, UDP or C5a and (B) LPA, S1P or PAF. Values are mean +/- SEM from n=4-8 samples per point.

**Figure S3. Robust synergy is observed for ligands that stimulate little to no Ca<sup>2+</sup> response individually.** Intracellular Ca<sup>2+</sup> levels were calculated for Fura-2-loaded NIH-3T3-C5aR cells. (A) Cells were stimulated with 1 or 10 nM C5a alone or in combination with 100  $\mu$ M UDP. (B) Cells were stimulated with 25 or 100  $\mu$ M UDP alone or in combination with 10 nM C5a. Peak offsets for C5a alone were 0-15 nM (median = 8 nM) while UDP yielded no measurable responses. Values shown are mean +/- SEM of n=4 samples per condition per assay from a representative assay of n=4 with similar results.

**Figure S4. C5a stimulated Ca<sup>2+</sup> responses and synergistic responses with UTP are PTx-sensitive.** NIH-3T3 cells stably expressing C5aR were treated for 18 h with buffer or 50 ng/ml PTx and Ca<sup>2+</sup> assays were performed to assess single-ligand and synergy responses. (A) Responses of cells to 10 nM C5a with or without pretreatment with PTx. (B) Responses of cells pretreated with buffer to 10 nM C5a, 100  $\mu$ M

UTP, or C5a+UTP. The predicted additive response is shown, and the calculated synergy ratio for this assay = 2.0. (C) Responses of cells pretreated with PTx to 10 nM C5a, 100  $\mu$ M UTP, or C5a+UTP. The predicted additive response is shown, and the calculated synergy ratio for this assay = 1.3. Values are mean from n=4 samples from a representative assays of two with similar results.

**Figure S5. Alternate G $\alpha$ i-linked GPCRs provide synergy with UTP and UDP.** (A) Responses to LPA and S1P are PTx-sensitive. NIH-3T3 cells pretreated with PTx (50 ng/ml for 18 h) were stimulated with 100  $\mu$ M UTP, 2.5  $\mu$ M LPA, or 1  $\mu$ M S1P. (B) UDP synergizes with LPA or S1P. Cells were stimulated with 100  $\mu$ M UDP, 50 nM LPA, and 50 nM S1P alone or in combination. Peak offset synergy ratios for dual ligand stimulations were 4.9 and 3.7 for UDP+LPA and UDP+S1P respectively. Results are from representative assays of n=3-4 each. (C) NIH-3T3 cells stably expressing the Ro2 RASSL form of the human kappa opioid receptor respond to spiradoline (Spir) in a PTx-sensitive manner. Cells treated with or without PTx (50 ng/ml for 18 h) were stimulated with 100 nM Spir. (D) Spiradoline synergizes with UTP. Cells were treated with 100  $\mu$ M and 500 nM Spir alone or in combination. Quantitation of responses was by peak-offset for each condition. The synergy ratio for the dual-ligand stimulation was 3. Results are from a representative assay of n=4 with similar results.

**Figure S6. Ca<sup>2+</sup> responses to spiradoline alone and its synergistic response with UTP are PTx-sensitive.** NIH-3T3 cells stably expressing Ro2 receptor were treated for 18 h with buffer (A) or 50 ng/ml PTx (B), and Ca<sup>2+</sup> assays were performed to assess synergy responses. (C) Peak-offsets of responses were measured and synergy ratios of 2.6 and 1.2 were calculated for buffer and PTx treatments, respectively.

**Figure S7. Levels of PLC $\beta$  isoform knockdown and YFP-PLC $\beta$  expression in NIH-3T3 cells.** (A) siRNA-mediated KD of PLC $\beta$  isoforms was performed in NIH-3T3-C5aR cells using PLC $\beta$  isoform specific siRNA versus LacZ control siRNA. After 72 h, RNA samples were taken in parallel with analyses of Ca<sup>2+</sup> responses. PLC $\beta$  isoform mRNA levels were measured by qRT-PCR and expressed as percent change vs LacZ control siRNA samples. (B) NIH-3T3 cells were stably transfected with YFP or YFP-tagged murine PLC $\beta$  isoforms and analyzed by FACS to measure YFP-fusion protein expression. (C) NIH-3T3 cells were stably transfected with YFP or YFP-tagged bovine PLC $\beta$ 4 (wild-type or C-terminal mutant ( $\Delta$ CT)) and analyzed by FACS to measure YFP-fusion protein expression. (D) PLC $\beta$ 4 inhibition of synergy is dependent on its G $\alpha$ q binding region. NIH-3T3 cells were stably transfected with YFP-bPLC $\beta$ 4, YFP-bPLC $\beta$ 4 $\Delta$ CT (C-terminal mutant), or YFP vector control and assayed for Ca<sup>2+</sup> response synergy to UTP + C5a. Synergy ratios were calculated for peak offset values. Values are mean $\pm$ -SEM from 2-3 assays using 2 independently derived cell lines per target, \*p<0.05 versus YFP.

**Figure S8. Levels of PLC $\beta$ 3 expression and knockdown in NIH-3T3 cells.** siRNA-mediated knockdown of mPLC $\beta$ 3 was performed in NIH-3T3-C5aR cells stably expressing YFP or YFP-tagged PLC $\beta$  constructs. After 72 h, total protein and RNA samples were taken in parallel with analyses of Ca<sup>2+</sup> responses. (A) Western blotting for mPLC $\beta$ 3 in YFP or YFP-hPLC $\beta$ 3-expressing cells treated with mPLC $\beta$ 3 isoform-specific siRNA versus LacZ control siRNA. Arrows indicate endogenous mPLC $\beta$ 3 and introduced YFP-hPLC $\beta$ 3. (B) mPLC $\beta$ 3 mRNA was measured by qRT-PCR. Levels are expressed as percent change vs LacZ control siRNA samples.

**Figure S9. Transfection of PLC $\beta$  isoforms and mutants into NIH-3T3 cells.** NIH-3T3 cells were stably transfected with YFP or YFP-tagged PLC $\beta$  constructs including: intact hPLC $\beta$ 3; C-terminal

mutant, hPLC $\beta$ 3 $\Delta$ CT; Y-box mutant, hPLC $\beta$ 3 $\Delta$ YB, C-terminal mutant hPLC $\beta$ 3 $\Delta$ YB $\Delta$ CT, intact mPLC $\beta$ 2, and a C-terminal deletion mutant of mPLC $\beta$ 2 (PLC $\beta$ 2-CT). (A) Cells were analyzed by FACS to measure YFP-fusion protein expression. (B) Cells were then subjected to RNAi using murine-specific anti-PLC $\beta$ 3 or LacZ control siRNA. After 72 h, RNA samples were taken in parallel with analyses of Ca<sup>2+</sup> responses. mPLC $\beta$ 3 mRNA was measured by qRT-PCR. Levels are expressed as percent change vs LacZ siRNA control samples. (C) C5a+UTP synergy ratios were calculated for each cell line and treatment (see Figs. 7,8) and the changes in synergy ratio (differences in synergy ratio between LacZ control and mPLC $\beta$ 3-specific siRNA) for each cell line were calculated to determine the delta with knockdown of mPLC $\beta$ 3. A delta of zero (0) reflects no change in synergy with mPLC $\beta$ 3 KD, and thus the ability of the introduced construct to substitute for endogenous mPLC $\beta$ 3. Values are mean $\pm$ -SEM from n=6-15 assays using 2-7 independently derived cell lines per target. (D) PLC $\beta$ 2 can substitute for PLC $\beta$ 3 to mediate Ca<sup>2+</sup> synergy in NIH-3T3 cells. NIH-3T3 cells were stably transfected with YFP or YFP-tagged PLC $\beta$  constructs including: intact mPLC $\beta$ 2 or a C-terminal deletion mutant of mPLC $\beta$ 2 (PLC $\beta$ 2-CT). Cells were then subjected to RNAi using murine-specific anti-PLC $\beta$ 3 or LacZ control siRNA. Synergy ratios were calculated for each cell line and treatment and the changes in synergy ratio for each cell line were calculated to determine the delta with knockdown of mPLC $\beta$ 3. Although intact mPLC $\beta$ 2 maintained synergy ( $\gamma=0$  shows no change in synergy with KD of mPLC $\beta$ 3), the C-terminal mutant did not, \* $p<0.05$ . Values are mean $\pm$ -SEM from n=3-7 assays using 2-3 independently derived cell lines per target.

Supplements

Figure S1

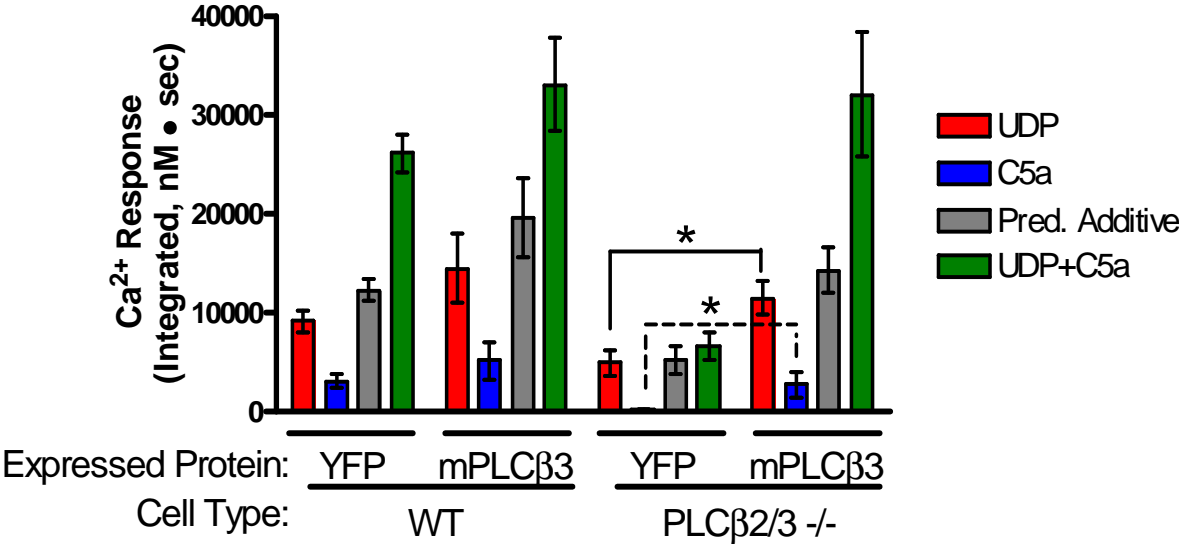

Figure S2

**A**

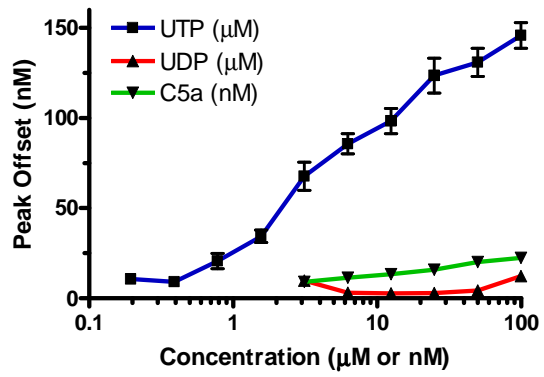

**B**

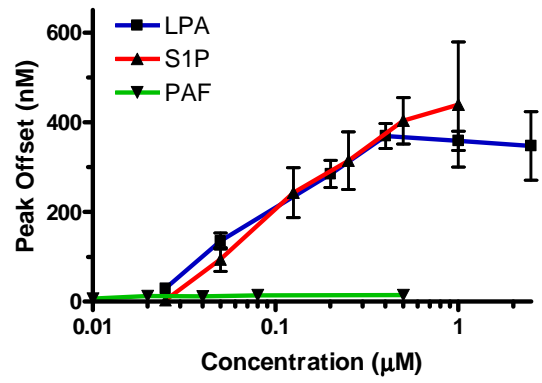

Figure S3

**A**

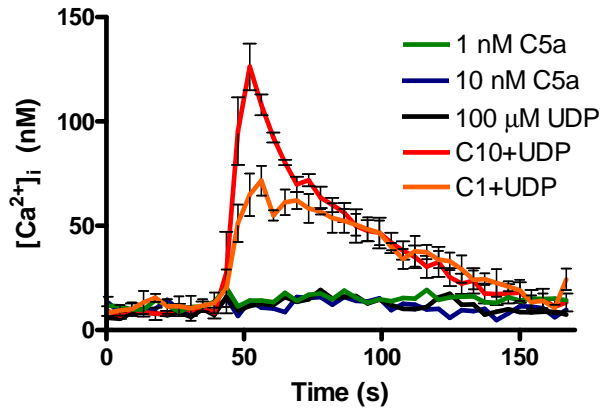

**B**

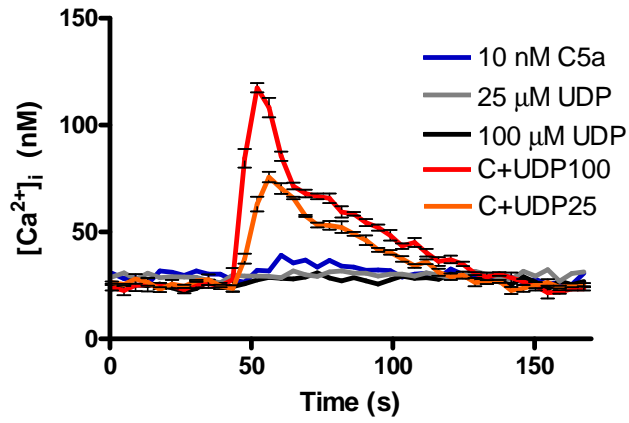

Figure S4

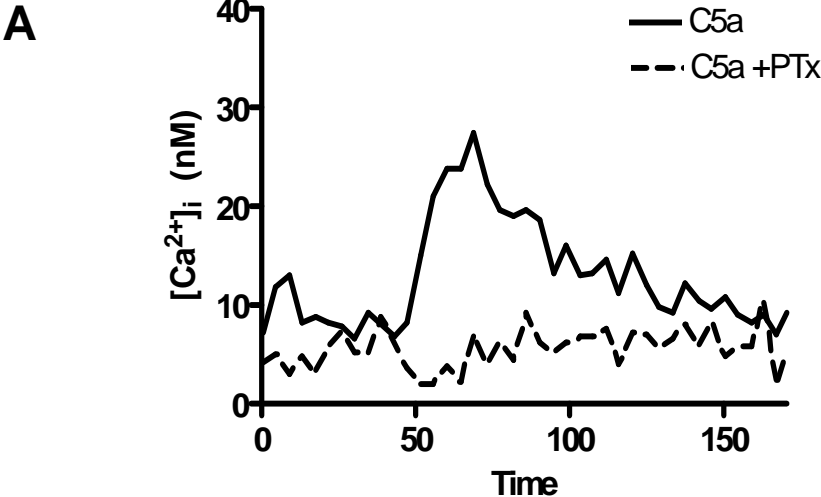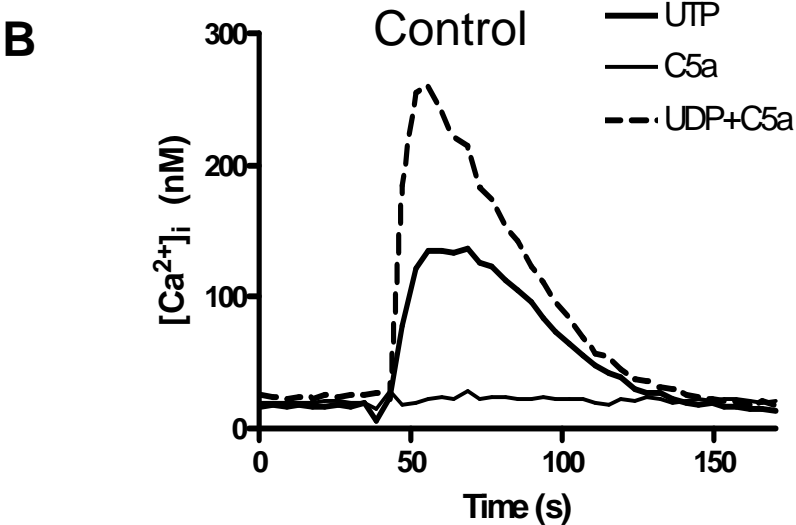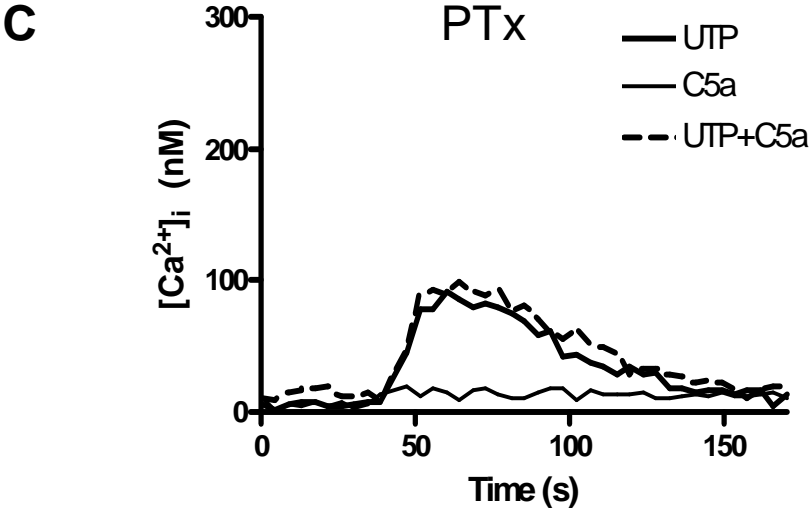

Figure S5

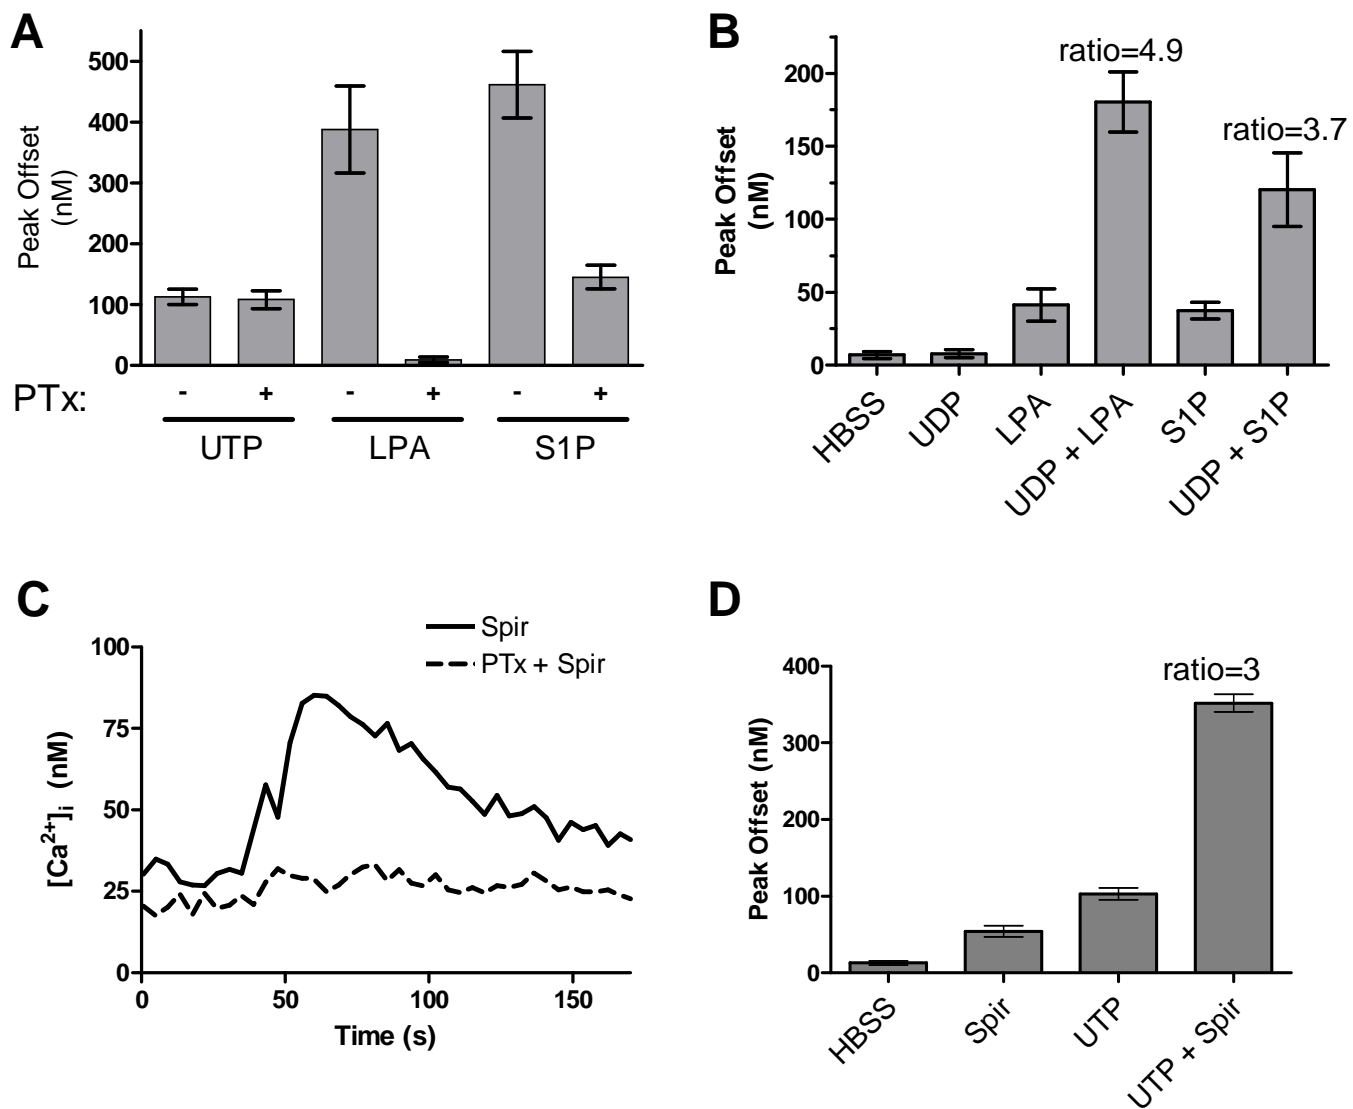



Figure S6

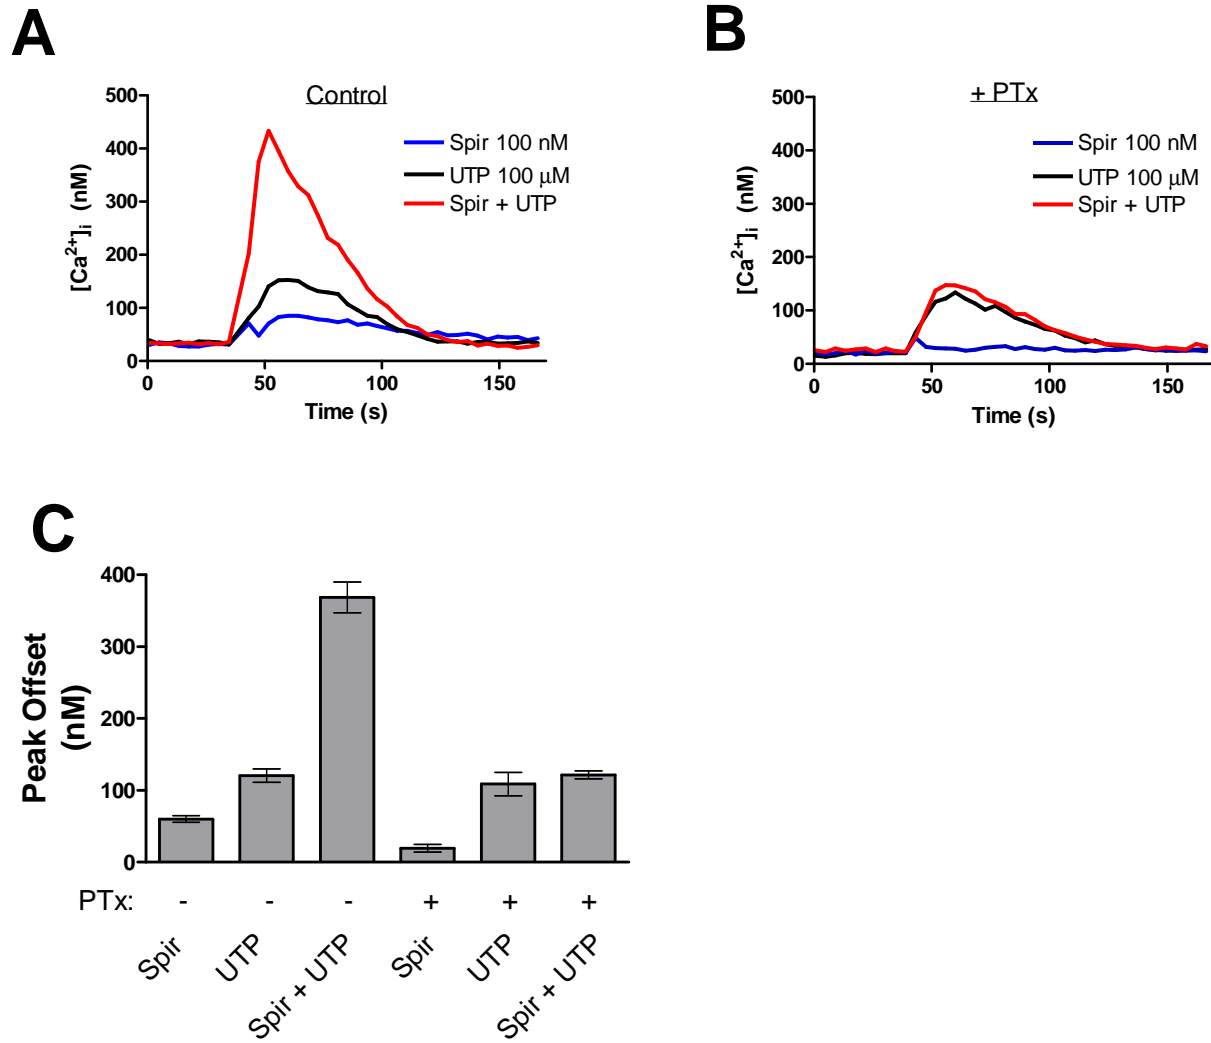

Figure S7

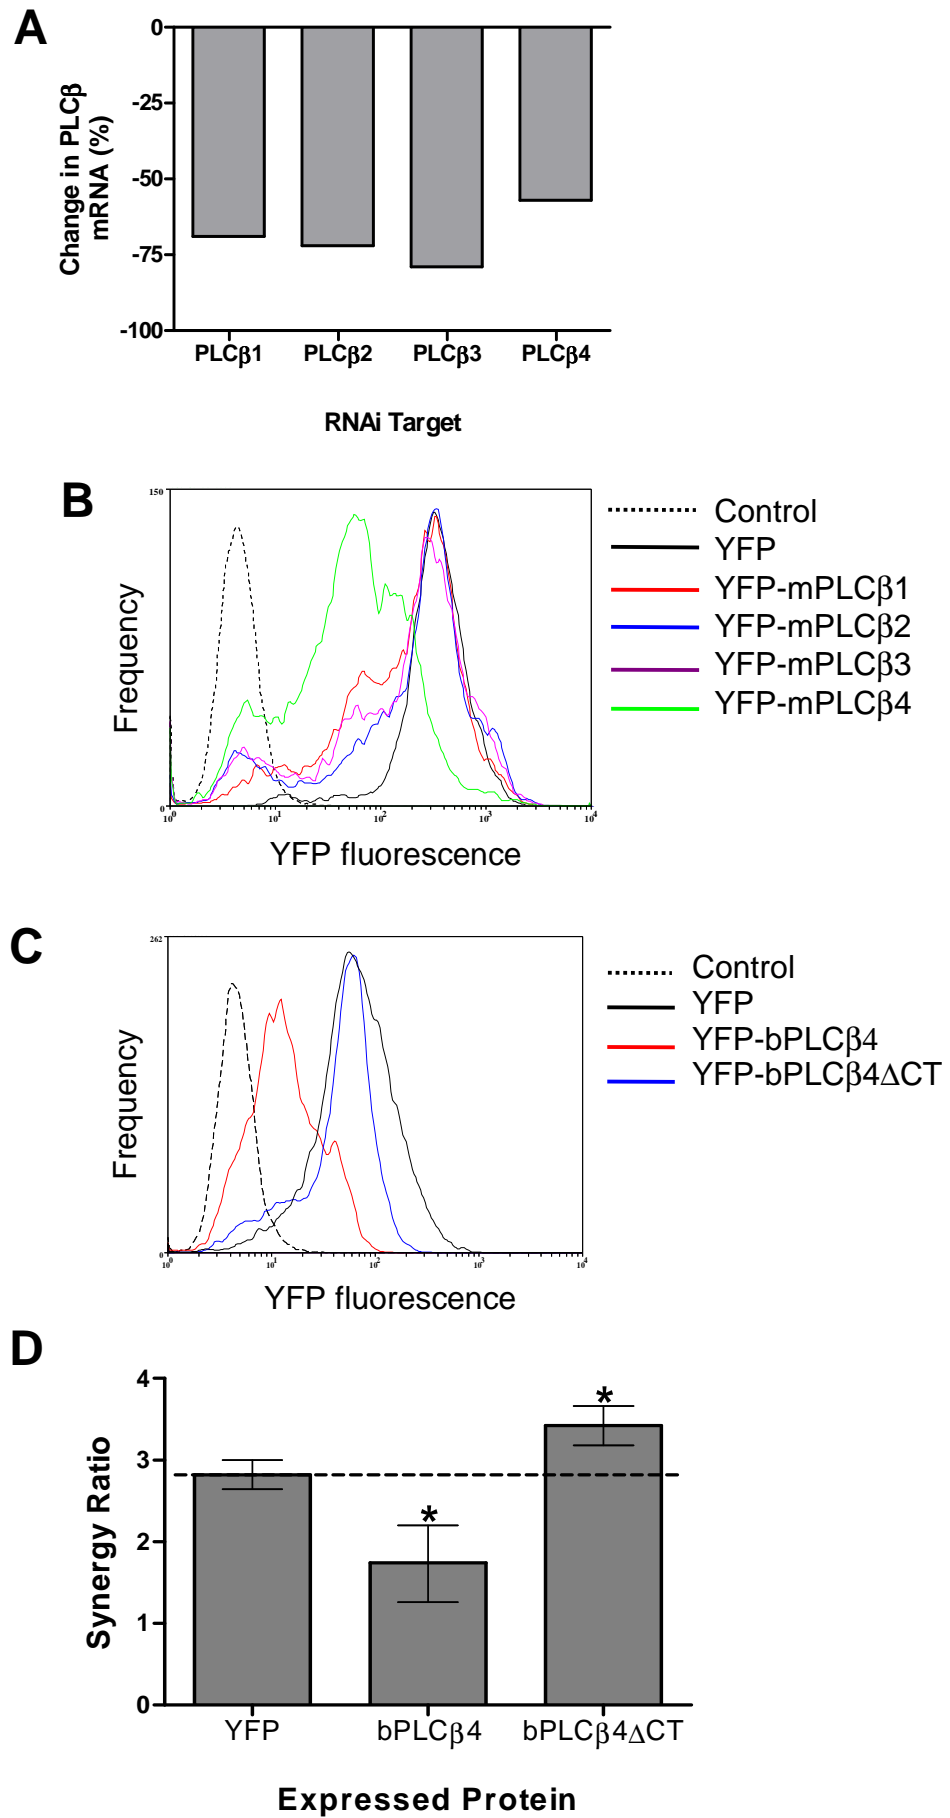

Figure S8

**A**

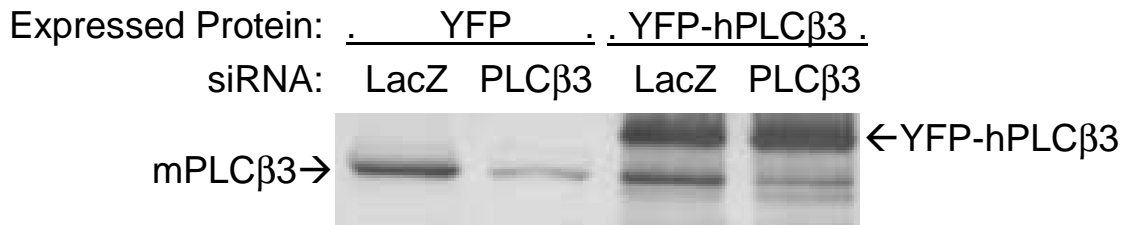

**B**

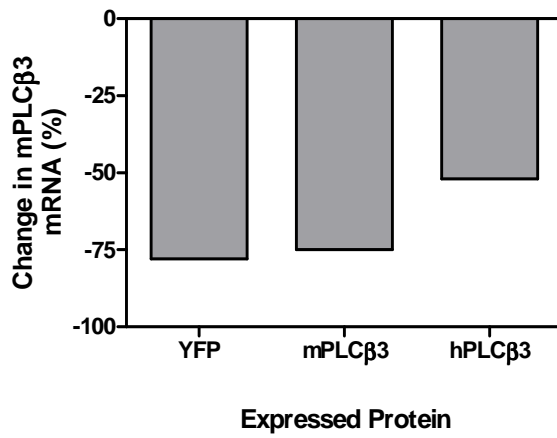

Figure S9

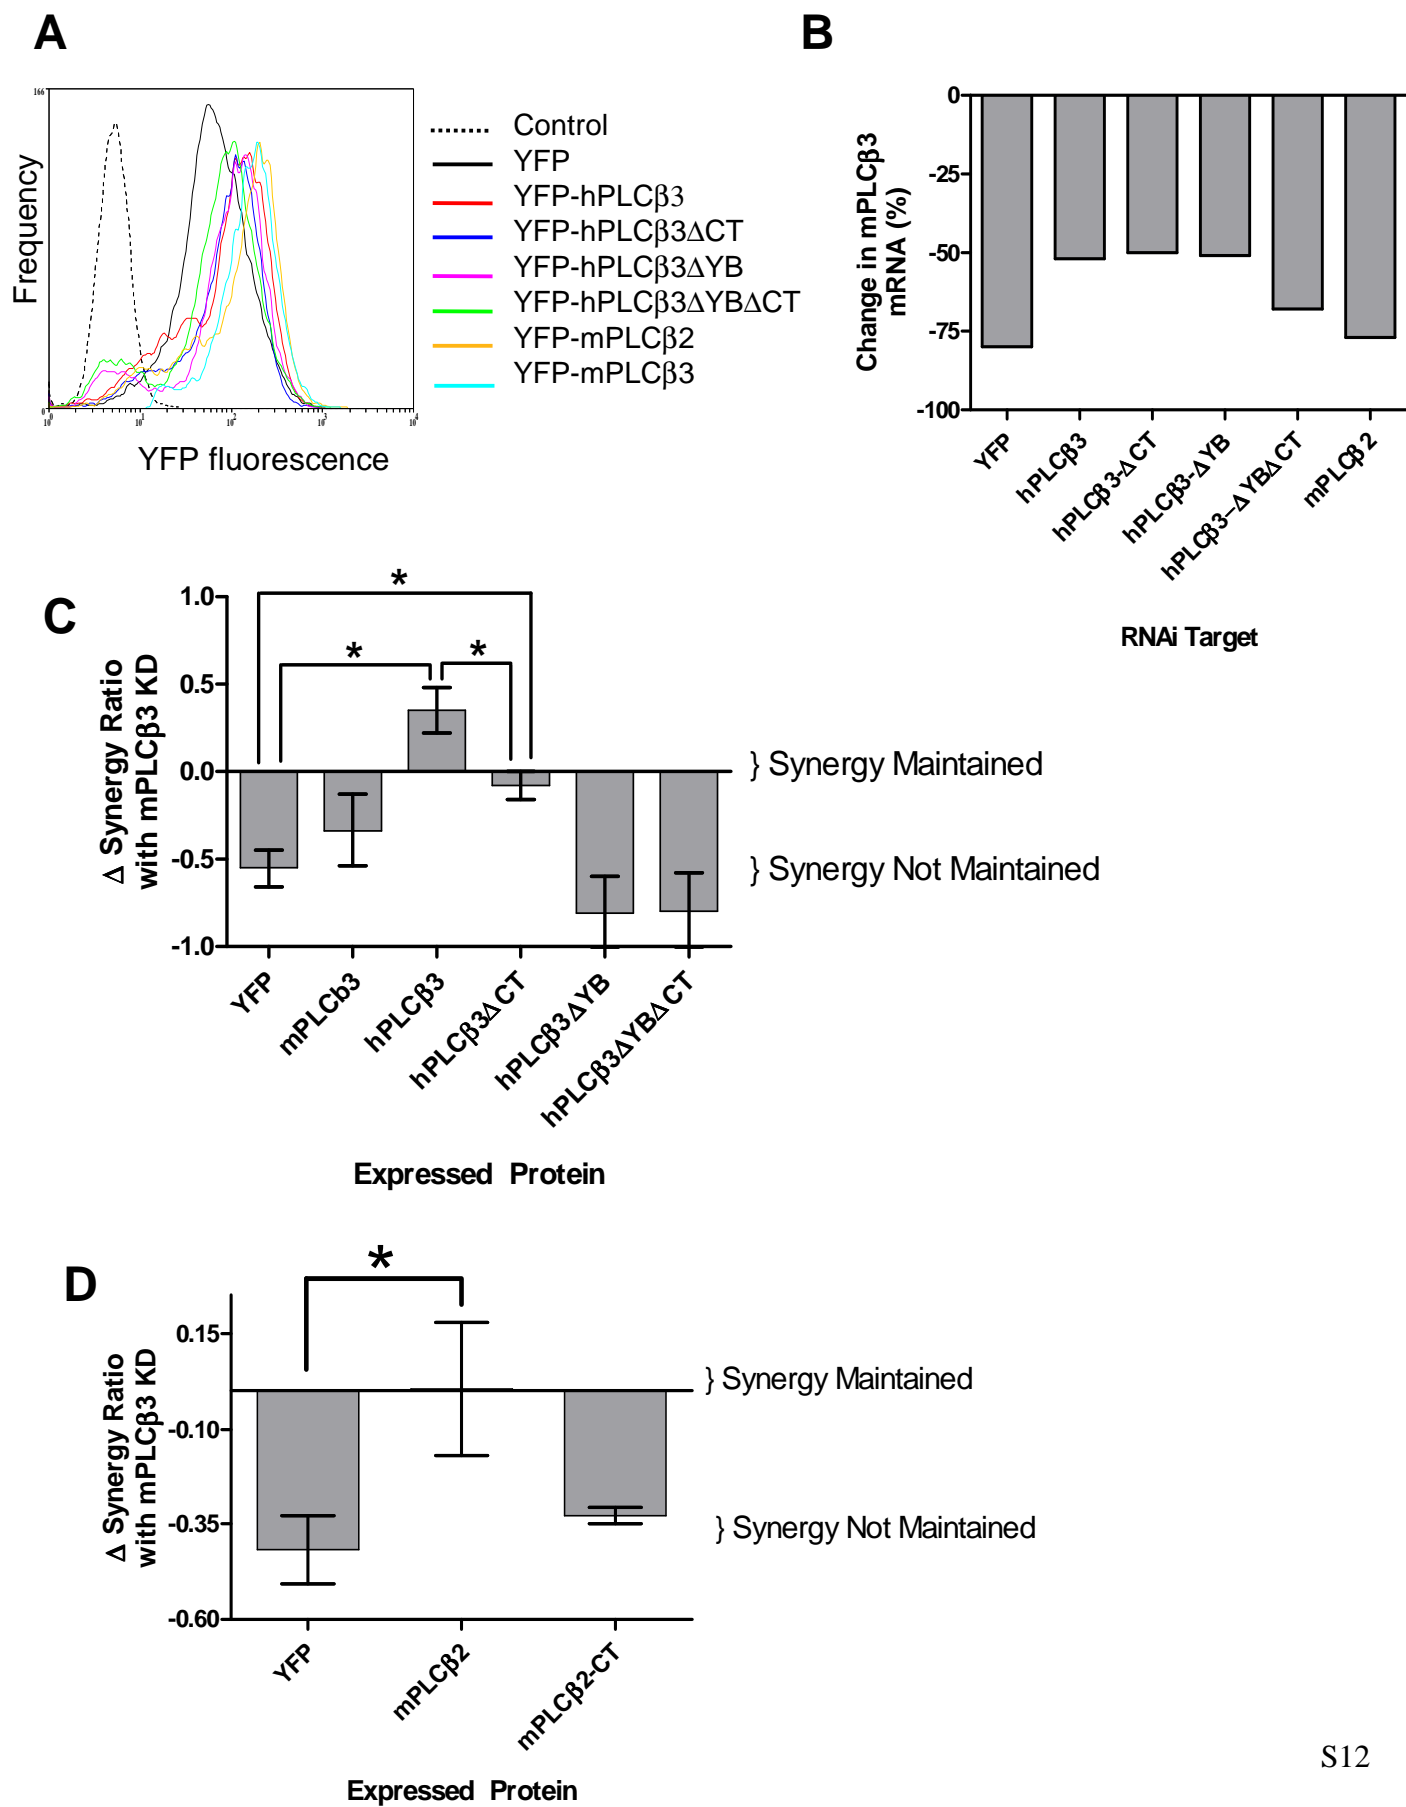

Supplement: supp_M110.198200_jbc.M110.198200-1.pdf [file supp_M110.198200_jbc.M110.198200-1.pdf]
